# Supplementary material for: Further investigations into the accuracy of infrared-radiofluorescence (IR-RF) and its inter-comparison with infrared photoluminescence (IRPL) dating
Source: Copernicus journal article supplement (doi:10.5194/gchron-2024-36), 2025-01-15
Supplement: Supplementary file 1 [file gchron-2024-36-supplement.pdf]

# Further investigations into the accuracy of infrared-radiofluorescence (IR-RF) and its inter-comparison with infrared photoluminescence (IRPL) dating

Mariana Sontag-González<sup>1</sup>, Madhav K. Murari<sup>2</sup>, Mayank Jain<sup>3</sup>, Marine Frouin<sup>4</sup>, Markus Fuchs<sup>1</sup>

<sup>1</sup>Department of Geography, Justus Liebig University Giessen, 35390 Giessen, Germany

<sup>2</sup>Inter University Accelerator Centre, 110067, New Delhi, Delhi, India

<sup>3</sup>Luminescence Physics and Technologies, Department of Physics, Technical University of Denmark Risø Campus, Roskilde, Denmark

<sup>4</sup>Department of Geosciences, Stony Brook University, 255 Earth and Space Sciences Building, Stony Brook, NY 11794-2100, USA

Correspondence to: Mariana Sontag-González ([Mariana.Sontag-Gonzalez@geogr.uni-giessen.de](mailto:Mariana.Sontag-Gonzalez@geogr.uni-giessen.de))

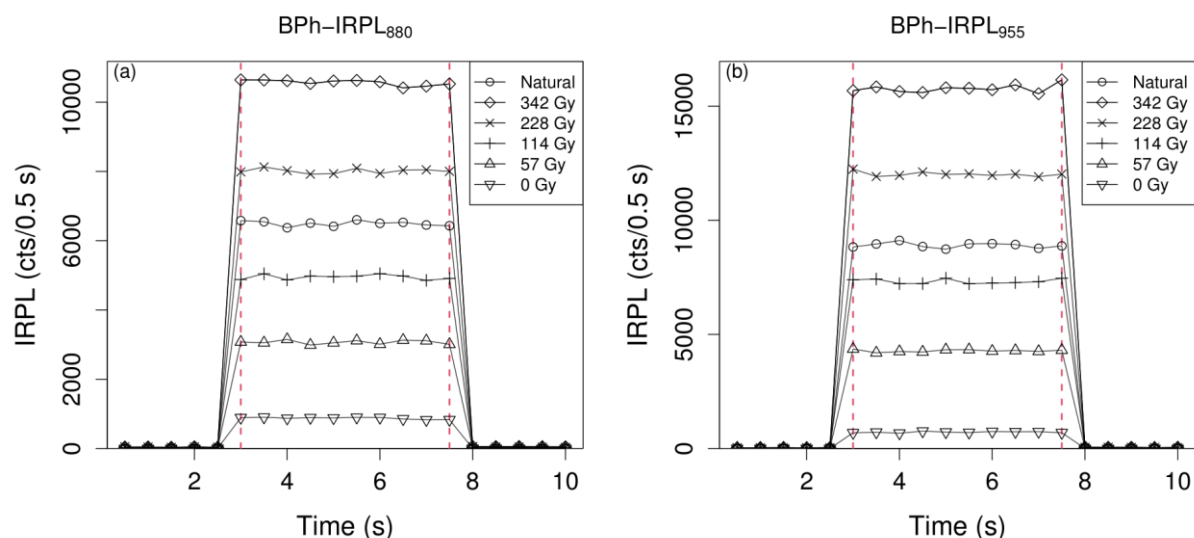

**Figure S1:** Example of IRPL curves from steps (a) 1 (880 nm emission before preheat) and (b) 2 (955 nm emission before preheat) for each cycle of the protocol in Table S1 for one aliquot of sample 075406. The red dashed vertical lines denote the integration limits used to calculate the IRPL before preheat (BPh).

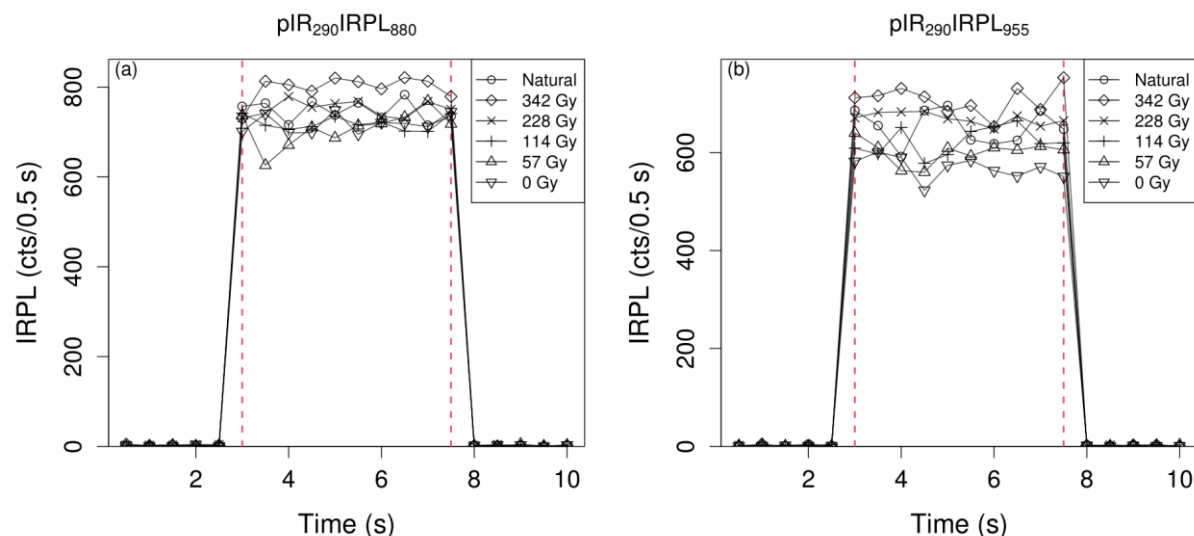

**Figure S2:** Example of IRPL curves from steps (a) 16 (880 nm emission) and (b) 17 (955 nm emission) for each cycle of the protocol in Table S1 for one aliquot of sample 075406. The red dashed vertical lines denote the integration limits used to calculate the background IRPL (same aliquot as in Fig. S1).

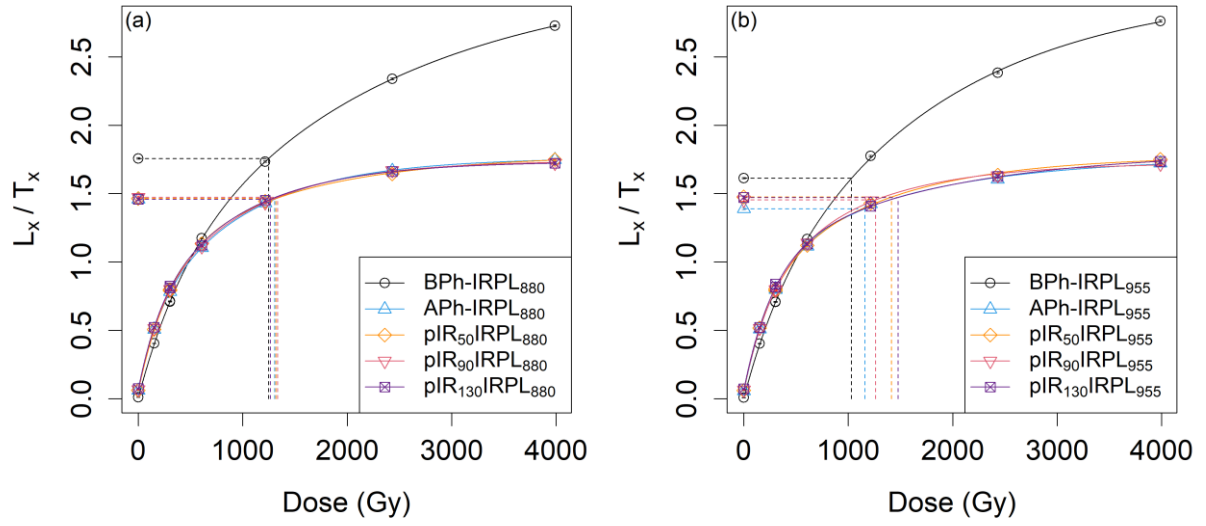

**Figure S3:** Examples of dose response curves for the five IRPL signals of (a) the 880 and (b) the 955 nm emission. The continuous lines are double exponential functions fitted to the sensitivity corrected signals ( $L_x/T_x$ ) of one aliquot of sample Gi326. The dashed lines show the interpolation of the natural sensitivity corrected signals ( $L_n/T_n$ ) onto the fitted curves to yield  $D_e$  values.

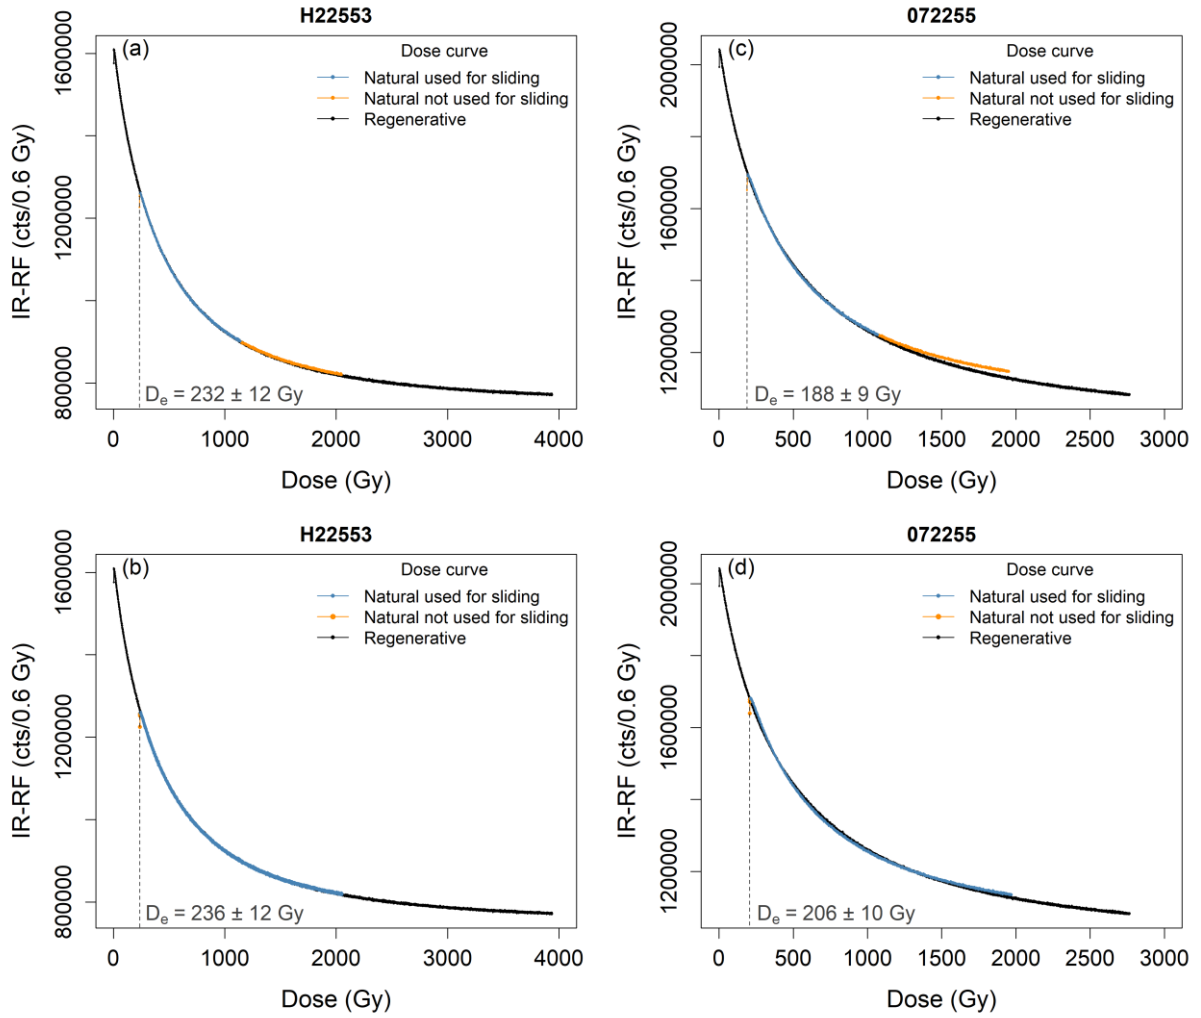

**Figure S4:** IR-RF<sub>70</sub>  $D_e$  estimation with a bandpass filter centred at 850 nm (FWHM: 40 nm) using a segment of the natural dose curve spanning either (a, c) 2–904 Gy or (b, d) 2–1808 Gy for one aliquot each of samples (a, b) H22553 and (c, d) 072255. Note the poor overall fit quality when using only the shorter segment for sample 072255 (c).

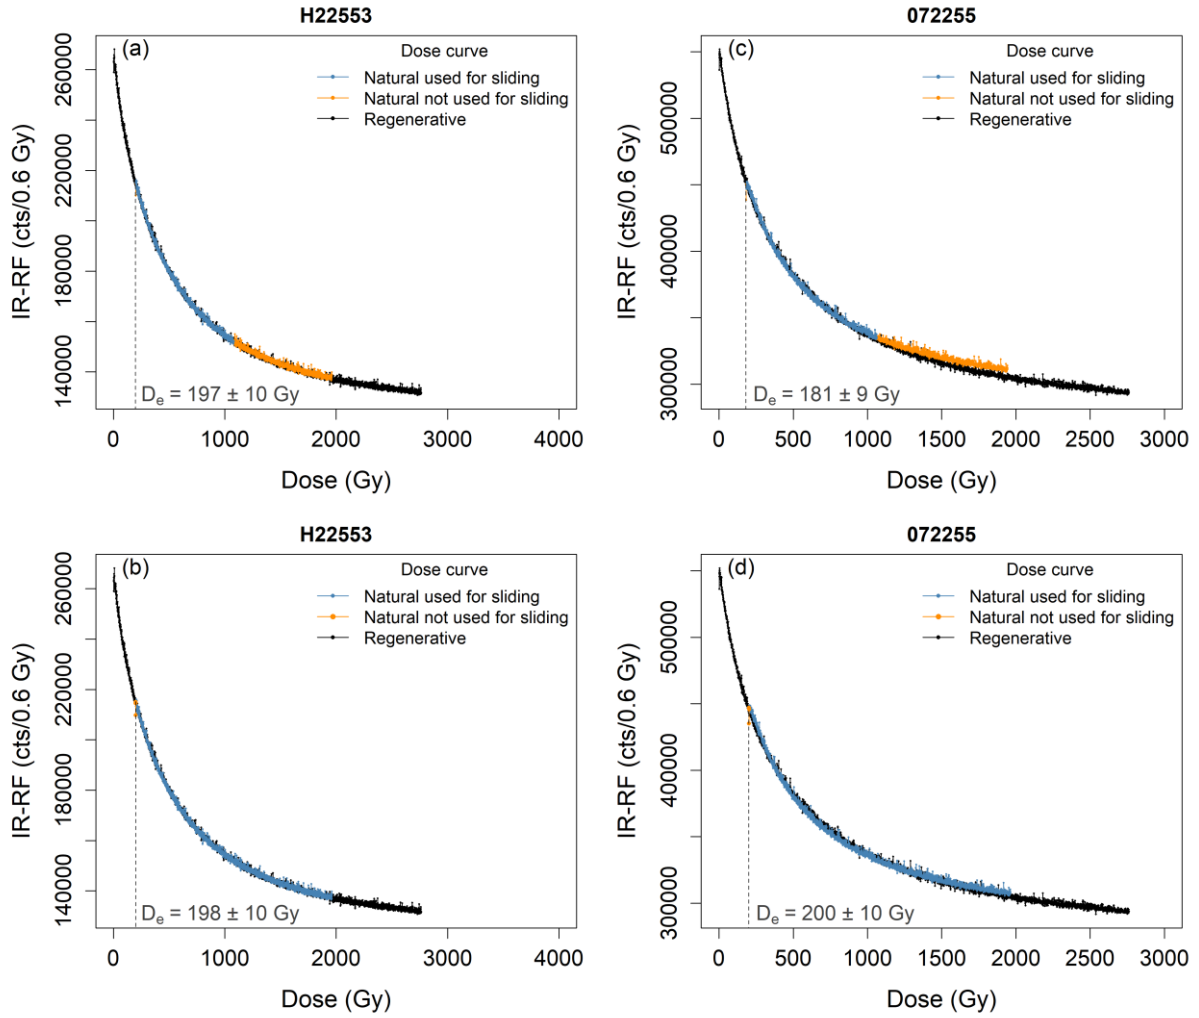

**Figure S5:** IR-RF<sub>70</sub>  $D_e$  estimation with a bandpass filter centred at 880 nm (FWHM: 10 nm) using a segment of the natural dose curve spanning either (a, c) 2–904 Gy or (b, d) 2–1808 Gy for one aliquot each of samples (a, b) H22553 and (c, d) 072255. Note the poor overall fit quality when using only the shorter segment for sample 072255 (c).

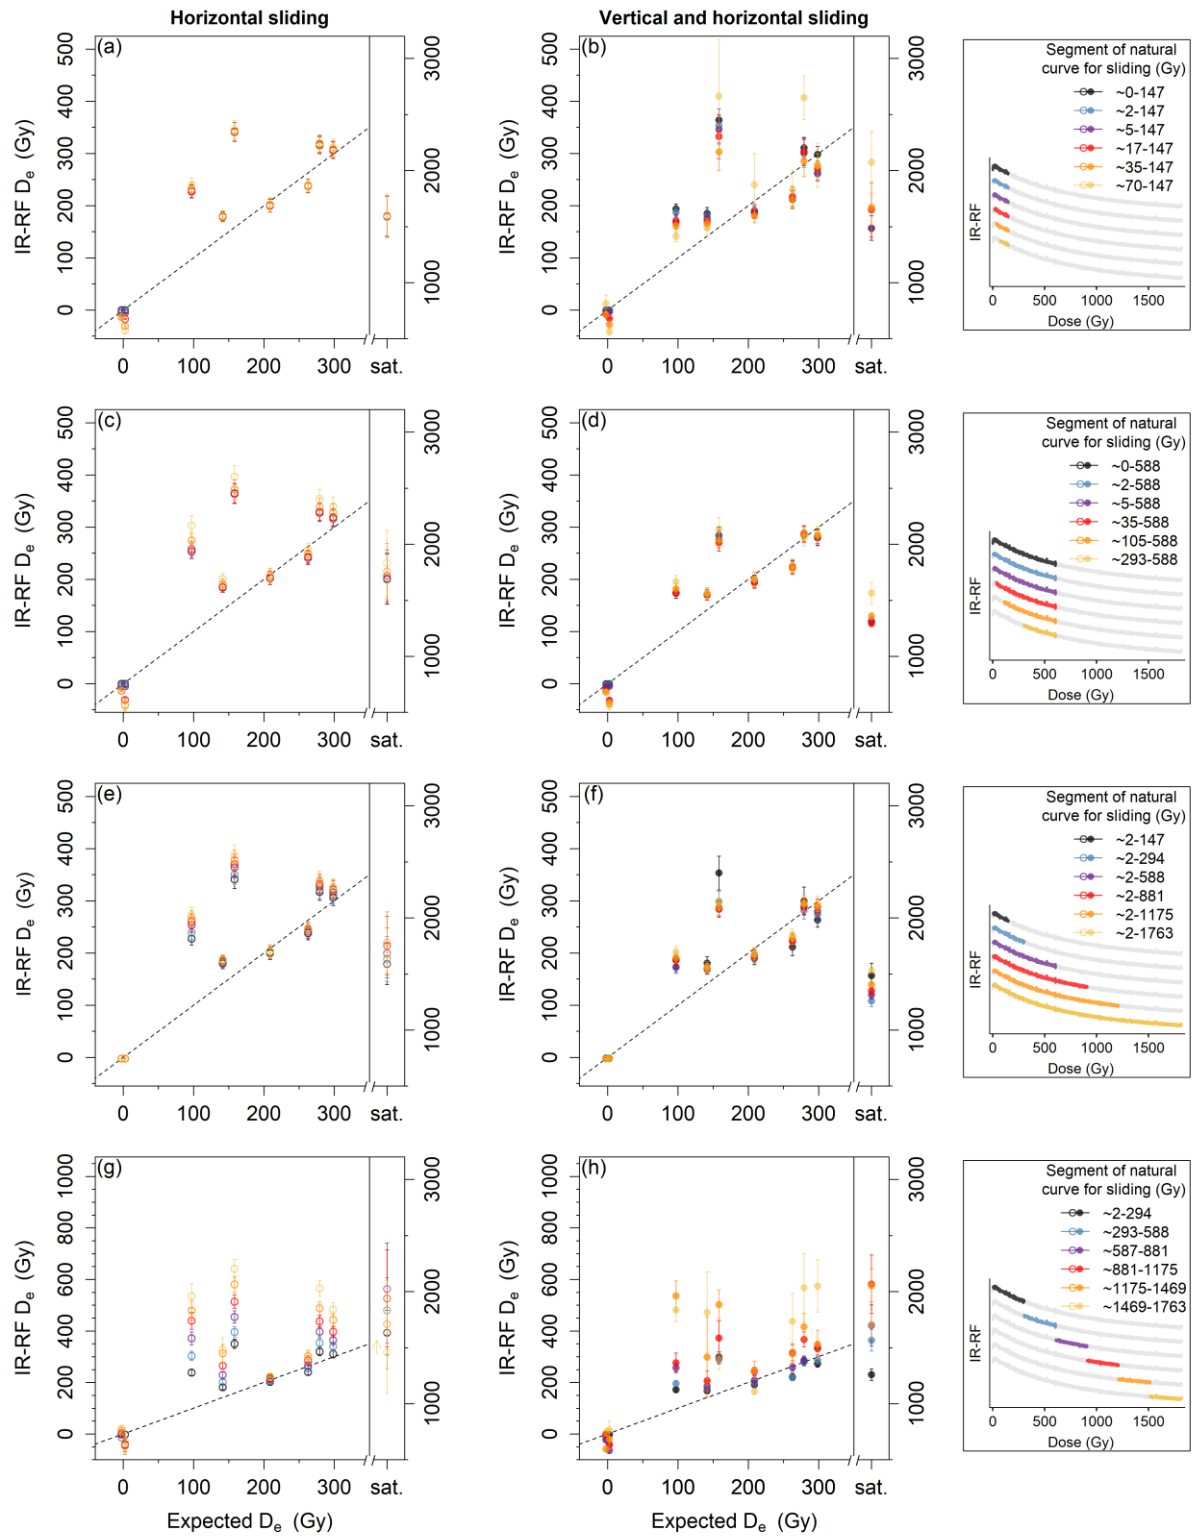

**Figure S6:** Comparison of IR-RF<sub>70</sub> mean  $D_e$  values with a filter centred at 880 nm (FWHM: 10 nm) using fixed segments of the natural dose curve and (a, c, e, g) only horizontal sliding or (b, d, f, h) vertical and horizontal sliding. For clarity, the used segments of a representative natural dose curve (sample 092202) are shown in the legend box to the right of the corresponding plots. Note that a 5 Gy interval was placed between the expected doses of the two modern samples to aid visualization. The  $D_e$  for the field-saturated sample Gi326 is shown on the right-hand y-axis in each plot; its expected  $D_e$  is 'saturated' (sat.). The dashed line indicates the 1:1 line. (g) Arrows indicate a minimum estimate caused by the limit of the regenerative curve.

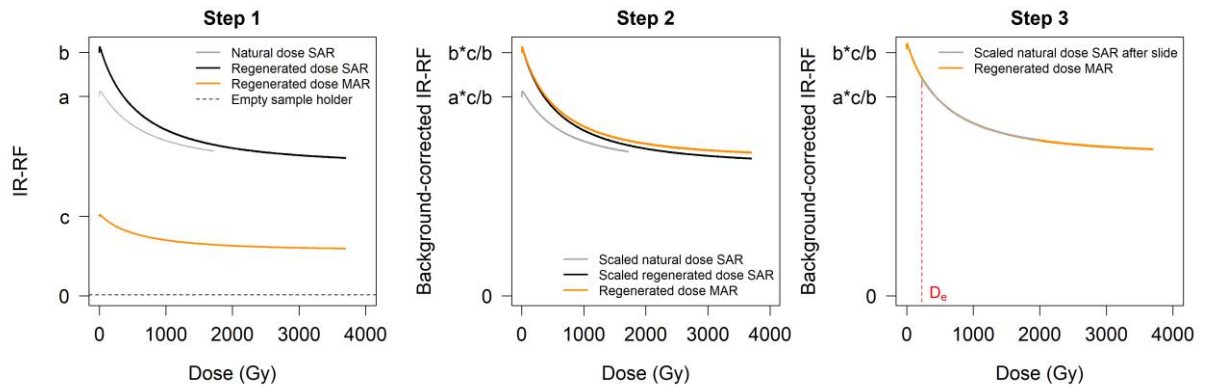

**Figure S7:** Schematic of MAR normalisation. After the SAR and MAR measurements (step 1), the natural dose curve of the SAR measurement is normalised (step 2) by dividing every data point by the initial signal intensity of the SAR regenerated dose curve and then multiplying by the initial signal intensity of the MAR regenerated dose curve. The mean signal intensity of an empty sample holder is subtracted as instrumental background from each curve prior to the normalisation. After normalisation, the MAR and SAR regenerated dose curves have the same initial signal intensity and the scaled natural dose (SAR) can be compared with the MAR curve through vertical and horizontal sliding to obtain a  $D_e$  value (step 3).

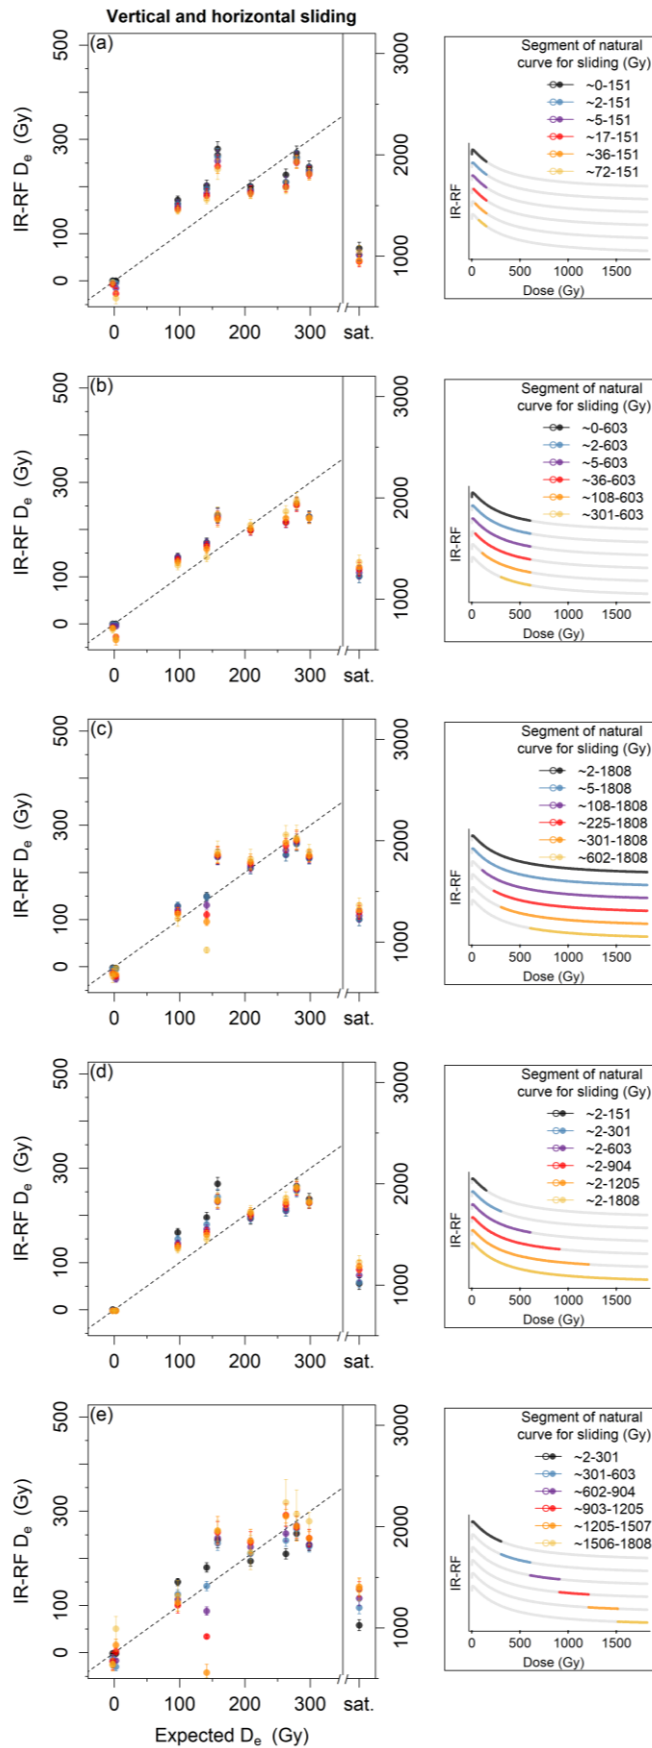

**Figure S8:** Comparison of IR-RF<sub>70</sub> mean  $D_e$  values using fixed segments of the natural dose curve. For clarity, the used segments of a representative natural dose curve (sample 092202) are shown in the legend box to the right of the corresponding plots. Note that a 5 Gy interval was placed between the expected doses of the two modern samples to aid visualization. The  $D_e$  for the field-saturated sample Gi326 is shown on the right-hand y-axis in each plot; its expected  $D_e$  is 'saturated' (sat.). The dashed line indicates the 1:1 line.

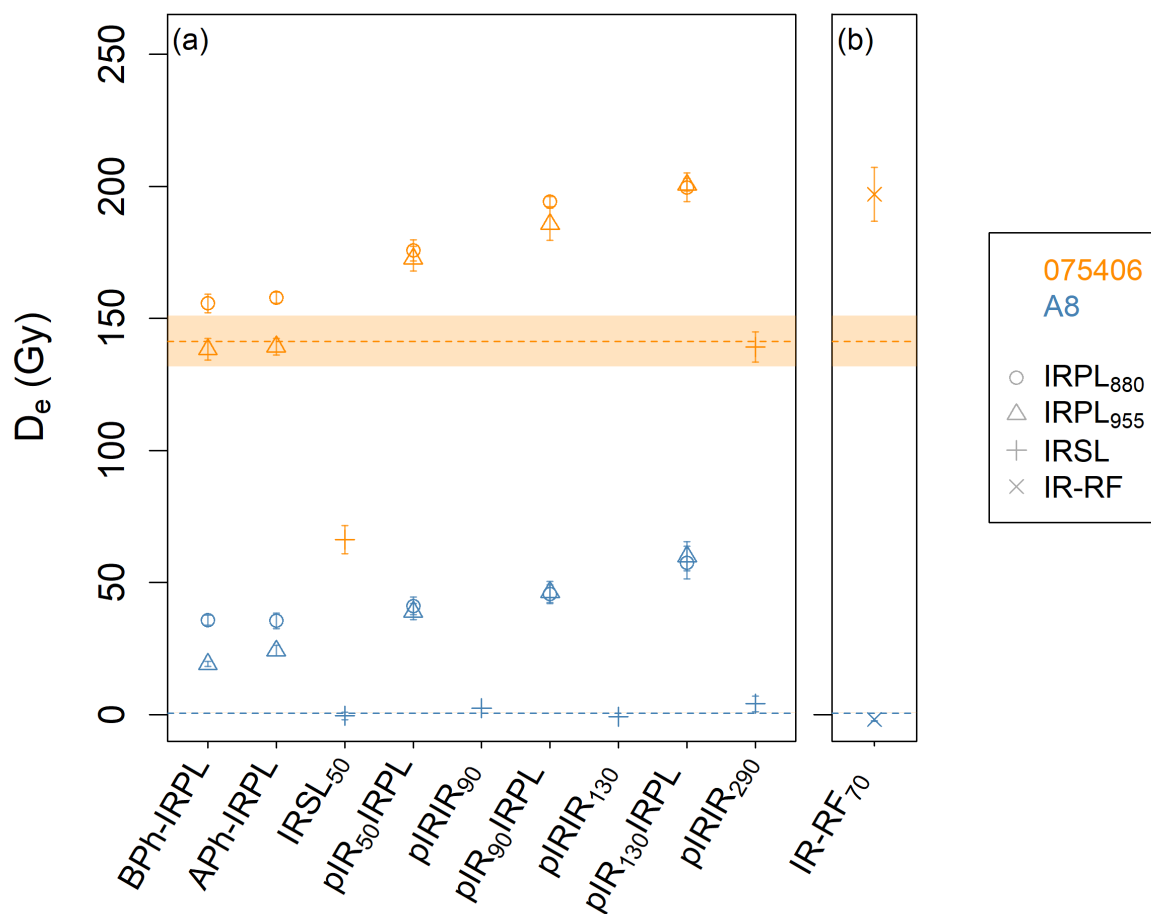

**Figure S9:** Mean  $D_e$  values obtained for samples 075406 and A8 following (a) the IRPL or (b) the IR-RF<sub>70</sub> protocols. The expected values for the samples are shown as dashed lines with the 1 $\sigma$  uncertainty range shown as shaded regions. For sample 075406, no aliquots were accepted for the pIRIR<sub>90</sub> nor the pIRIR<sub>130</sub> signals due to insufficient signal brightness. For sample A8, the same signals delivered only one accepted aliquot out of seven.

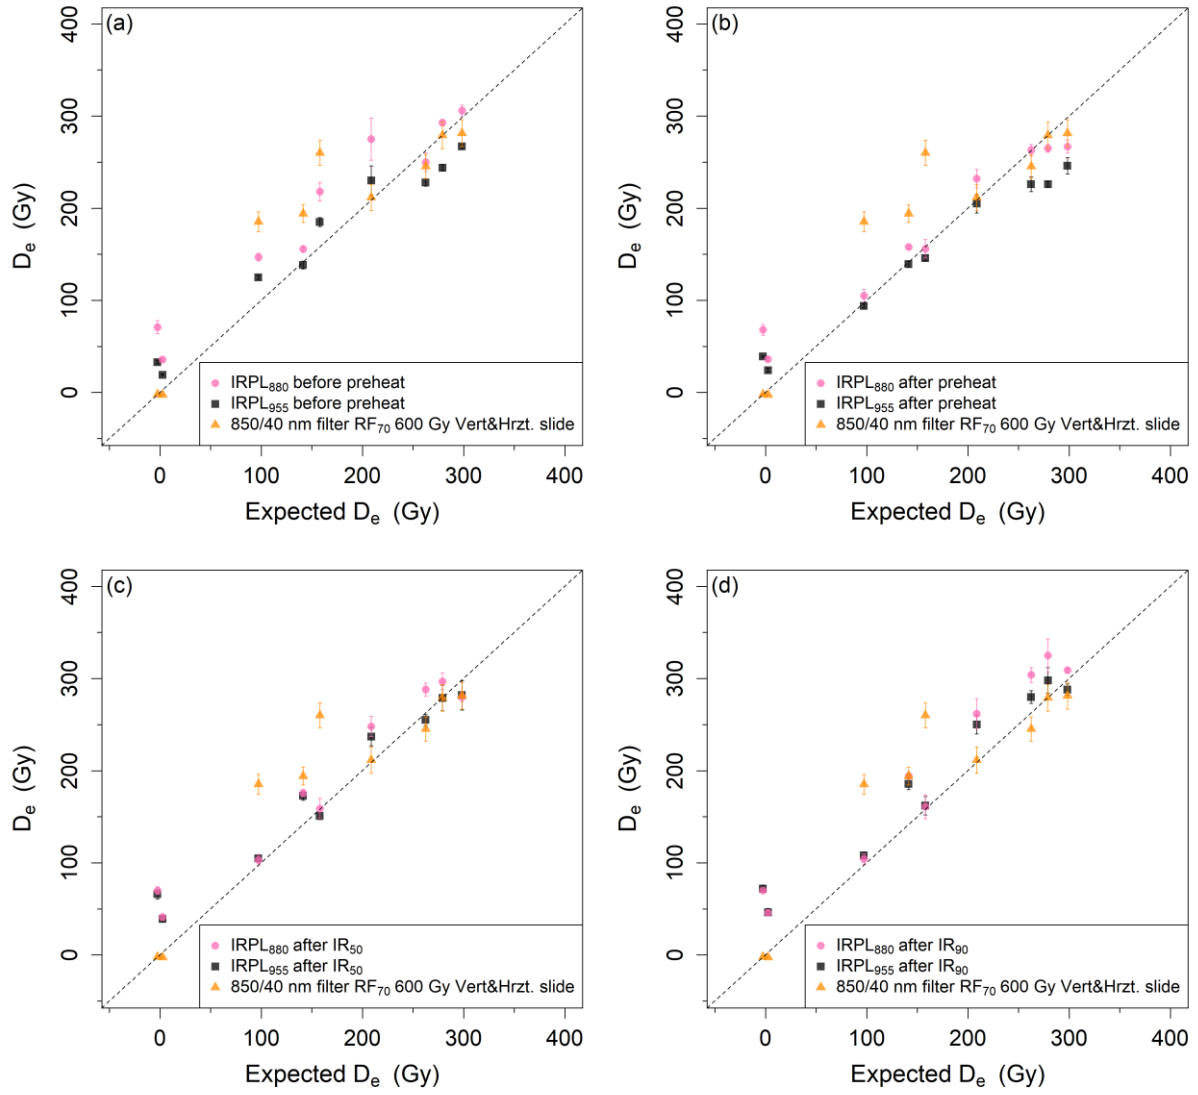

**Figure S10:** Comparison of mean IRPL and RF<sub>70</sub>  $D_e$  values varying the IRPL signals: (a) BPh-IRPL, (b) APh-IRPL, (c) pIR<sub>50</sub>IRPL, and (d) pIR<sub>90</sub>IRPL. The IRPL  $D_e$  are a combination of new measurements and those from Kumar et al. (2021). The subscript after 'IRPL' in the legend indicates the wavelength of the targeted emission. For RF<sub>70</sub>  $D_e$  estimation, we used a segment of the natural dose curve spanning 600 Gy but rejecting the initial 3 Gy. Note that a 5 Gy interval was placed between the expected doses of the two modern samples to aid visualization.

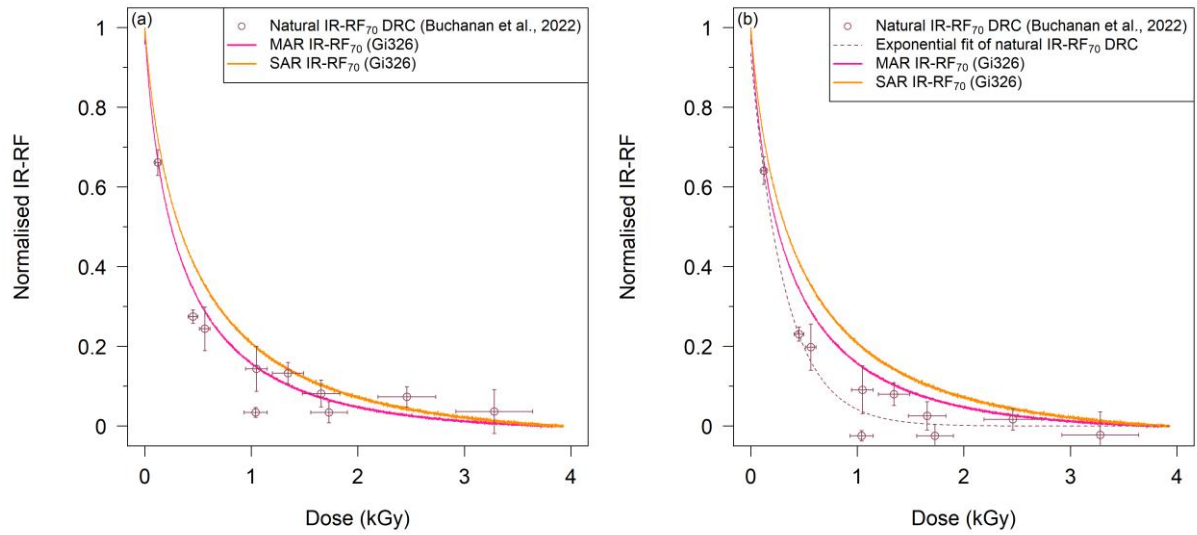

**Figure S11:** DRC shape comparison of representative aliquots of Gi326 and a natural IR-RF DRC obtained from samples from the Chinese Loess Plateau (Buchanan et al., 2022). A background was subtracted from the measured IR-RF curves of sample Gi326, corresponding to the median value of the last 100 channels (~60 Gy) before being normalised to their maximum values. (a) The data points obtained by Buchanan et al. (2022) to create a natural DRC are shown scaled to visually best fit the MAR IR-RF curve. (b) An exponential function was fitted to the data points from Buchanan et al. (2022), subtracting as background the minimum signal value. For better comparison, the fit and the data points are shown normalised to the saturation value of the fit (signal value at 3930 Gy).

**Table S1:** IRPL measurement protocol. BPh and APh refer to before and after preheat, respectively. This sequence is repeated for each natural and regenerative dose point.

| #     | Measurement step               | Resulting signal                       |
|-------|--------------------------------|----------------------------------------|
| 0     | Natural or regenerative dose   | -                                      |
| 1     | IRPL <sub>880</sub>            | BPh-IRPL <sub>880</sub>                |
| 2     | IRPL <sub>955</sub>            | BPh-IRPL <sub>955</sub>                |
| 3     | Preheat at 320°C for 60 s      | -                                      |
| 4     | IRPL <sub>880</sub>            | APh-IRPL <sub>880</sub>                |
| 5     | IRPL <sub>955</sub>            | APh-IRPL <sub>955</sub>                |
| 6     | IRSL at 50°C for 100 s         | IRSL <sub>50</sub>                     |
| 7     | IRPL <sub>880</sub>            | pIR <sub>50</sub> IRPL <sub>880</sub>  |
| 8     | IRPL <sub>955</sub>            | pIR <sub>50</sub> IRPL <sub>955</sub>  |
| 9     | IRSL at 90°C for 100 s         | pIR <sub>50</sub> IR <sub>90</sub>     |
| 10    | IRPL <sub>880</sub>            | pIR <sub>90</sub> IRPL <sub>880</sub>  |
| 11    | IRPL <sub>955</sub>            | pIR <sub>90</sub> IRPL <sub>955</sub>  |
| 12    | IRSL at 130°C for 100 s        | pIR <sub>90</sub> IR <sub>130</sub>    |
| 13    | IRPL <sub>880</sub>            | pIR <sub>130</sub> IRPL <sub>880</sub> |
| 14    | IRPL <sub>955</sub>            | pIR <sub>130</sub> IRPL <sub>955</sub> |
| 15    | IR cleanout at 290°C for 100 s | pIR <sub>130</sub> IR <sub>290</sub>   |
| 16    | IRPL <sub>880</sub>            | background IRPL <sub>880</sub>         |
| 17    | IRPL <sub>955</sub>            | background IRPL <sub>955</sub>         |
| 18    | Test dose                      | -                                      |
| 19–35 | Repeat steps 1–17              |                                        |
